# Supplementary material
Source: PubMed Central journal article supplement (PMC7335809)

## **SUPPLEMENTARY FILE**

### ***2.1. Molecular docking***

#### ***2.1.1 Protein preparation***

The docking simulation study of 32 different bioactive molecules from the plant *Asparagus racemosus* was performed on the 1.9 Å crystal structure of NSP15 Endoribonuclease from SARS CoV-2 in the complex with a citrate (PDB ID: 6W01) and prefusion 2019-nCoV spike glycoprotein with a single receptor-binding domain up (PDB ID: 6MOJ) which was retrieved from protein data bank (<https://www.rcsb.org>). The protein preparation wizard of Schrödinger maestro 2018-1 MM share version was used to prepare the structure by adding hydrogen, treating metal, deleting water molecules and assigning partial charges by using the OPLS-2005 force field, then assigning protonation states and determining restrained and further partial energy was minimized with 0.3Å RMSD limit. The binding sites were defined after removing the ligand then grid was generated using a grid box volume of 20\_20\_20 Å.

#### ***2.1.2 Ligand preparation***

The 2D structure of ligands were downloaded from pubchem compound database (<https://pubchem.ncbi.nlm.nih.gov>) in SDF format and uploaded to the work space. Then ligprep module of maestro was used to generate the 3D structure and OPLS-2005 force field was used to generate the different conformation of each ligand. The stable conformer of each Saikosaponin with minimum potential energy was further processed.

#### ***2.1.3 Protein ligand docking***

Glide module of Schrödinger suite was used to dock the each ligand into the identified binding site of grid, and the lowest binding pose of each docking run was retained. The results of simulations were analyzed using glide XP visualizer, and the important active site interactions were analyzed along with the scoring functions.

### ***2.2 Molecular Dynamics (MD) Simulation and Molecular Mechanics-Generalized Born Solvent Accessibility (MM-GBSA) Analysis***

#### ***2.2.1. System preparation***

All the MD simulations were done on AMBER 18 software package. ANTECHAMBR was used for ligand preparation and to determine the charges on ligand and further GAF force field was used for parametrization. Complexes of protein and ligand were prepared with the help

of xleap. The SARS-CoV-2 spike protein receptor-binding domain and NSP 15 endoribonuclease were solvated separately in truncated octahedron of TIP3P box giving a total of 24515 and 20364 water molecules respectively. Sufficient number of counter ions  $\text{Na}^+$  and  $\text{Cl}^-$  were added to neutralize the simulation system and 0.1M of ionic strength was achieved. To parameterize the amino acids and to model the proteins FF14SB force field was used.

### *2.2.2. Unbiased MD simulation*

Simulations were performed for 100 ns of time step on Nvidia V100-SXM2-16GB Graphic Processing Unit using the PMEMD.CUDA module. Simulations were run at 1 atm constant pressure using Monte Carlo barostat and 300 K constant temperature by using Langevin thermostat with a collision frequency of  $2\text{ps}^{-1}$  and the volume exchange was attempted for every 100 fs. An integration step of 2 fs was also used for simulation the hydrogen atoms involving bonds were constrained by using SHAKE algorithm. Long range electrostatic interactions were computed by using Particle Mesh Ewald method while for short range interaction a cutoff of 8 Å was used. Equilibration consisted of rounds of NVT and NPT equilibration for 10 ns in total. CPPTRAJ was used to analyze the interactions over full trajectory after taking configuration at every 4 ps. RMSD, RMSF and MMGBSA binding free energy was determined after analyzing the trajectories.

### *2.2.3. MM-GBSA analysis*

The MM-GBSA was performed on Amber18 and Amber18 tools. After simulation of the protein-ligand complexes, all the trajectories of 100 ns covering all the 10000 frames were used for MM-GBSA analysis. All the results in the form of energies were tabulated and reported in Kcal/mol.

**Table S1:** List of bio-actives with binding interaction parameter i.e. binding energy with the PDB: **6W01** and PDB: **6M0J** of SARS-CoV-2

| Sr. No. | Pubchem<br>CID | Name                 | Binding energy Kcal/mol |        |
|---------|----------------|----------------------|-------------------------|--------|
|         |                |                      | 6W01                    | 6M0J   |
| 1       | 101847690      | Shatavarin-IX        | -4.961                  | -4.423 |
| 2       | 101847689      | Shatavarin-VIII      | -4.953                  | -5.062 |
| 3       | 101389835      | Sarsasapogenin-N     | -4.916                  | -4.652 |
| 4       | 5281643        | Hyperoside (Hyperin) | -4.879                  | -4.641 |
| 5       | 101847688      | Shatavarin-VII       | -4.878                  | -5.245 |
| 6       | 21575007       | Asparanin-A          | -4.784                  | -3.425 |
| 7       | 102253064      | Racemoside-C         | -4.591                  | -4.581 |
| 8       | 624971         | Racemosol            | -4.061                  | -3.736 |
| 9       | 44203608       | Shatavaroside-A      | -3.953                  | -5.222 |
| 10      | 102473756      | Curillin-G           | -3.785                  | -4.1   |
| 11      | 92095          | Sarsasapogenin       | -3.432                  | 0      |
| 12      | 158604         | Asparanin-C          | -3.421                  | -3.972 |
| 13      | 122364577      | Racemosol-C          | -2.233                  | -2.761 |
| 14      | 122364578      | Racemosol-D          | 0                       | 0      |
| 15      | 122209042      | Racemosol-B          | 0                       | 0      |
| 16      | 45269800       | Racemosol-A          | 0                       | 0      |

**Figure S1.** Structure of *Withania somnifera* phytochemicals

| Name         | Structure                                                                                                                                                                                                                                                                                                                                                                                                                                                                                                                                                                                                                                                                         |
|--------------|-----------------------------------------------------------------------------------------------------------------------------------------------------------------------------------------------------------------------------------------------------------------------------------------------------------------------------------------------------------------------------------------------------------------------------------------------------------------------------------------------------------------------------------------------------------------------------------------------------------------------------------------------------------------------------------|
| Asparoside C | 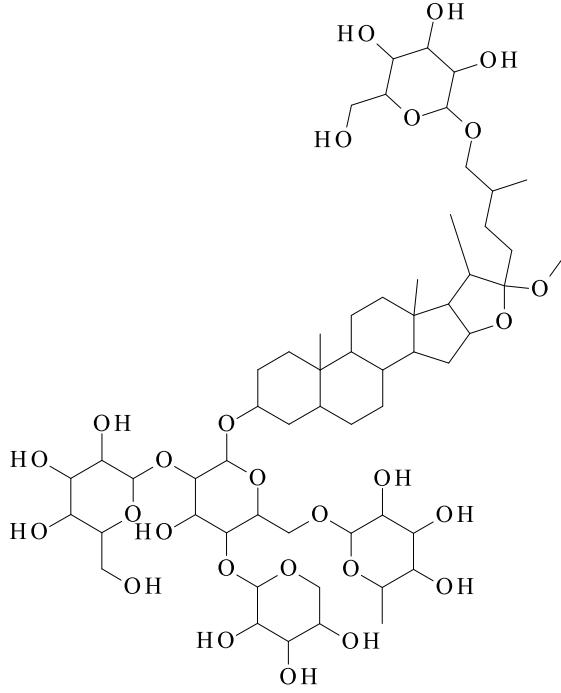 <p>The chemical structure of Asparoside C is a complex polyphenolic compound. It features a central pentacyclic core consisting of a pentacyclic ring system with a methyl group and a methoxy group. This core is linked via an ether bridge to a side chain that includes a decalin-like bicyclic system. The structure is heavily substituted with multiple sugar moieties, including galactose, glucose, and mannose, which are linked to the core through various glycosidic bonds. The galactose units are particularly prominent, with several hydroxyl groups explicitly labeled.</p> |
| Asparoside D |  <p>The chemical structure of Asparoside D is very similar to Asparoside C, sharing the same central pentacyclic core and side chain. The primary difference lies in the glycosylation pattern. In Asparoside D, the galactose units are substituted with different sugar moieties, including a glucose unit and a mannose unit, which are also linked via glycosidic bonds. The overall structure is highly branched and contains numerous hydroxyl groups, characteristic of polyphenolic compounds.</p>                                                                                    |

|                                         |                                                                                     |
|-----------------------------------------|-------------------------------------------------------------------------------------|
| <p>Shatavarin I<br/>(Asparaoside B)</p> | 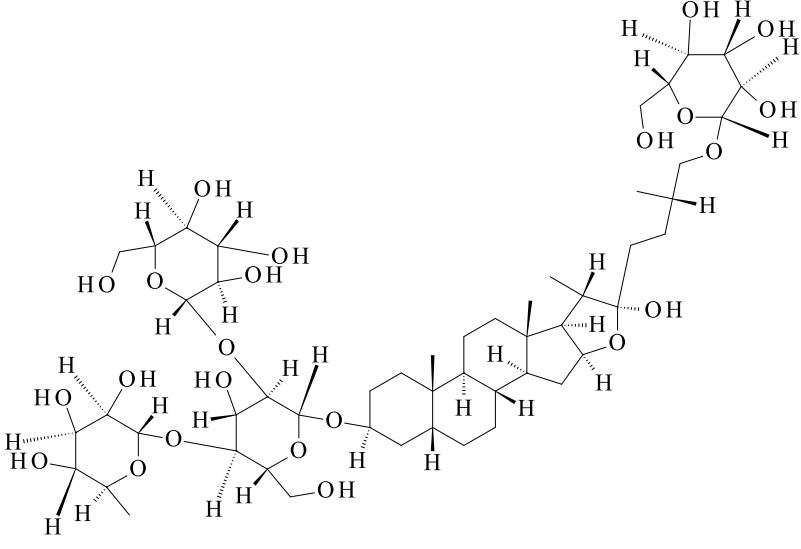  |
| <p>Shatavarin X</p>                     |  |

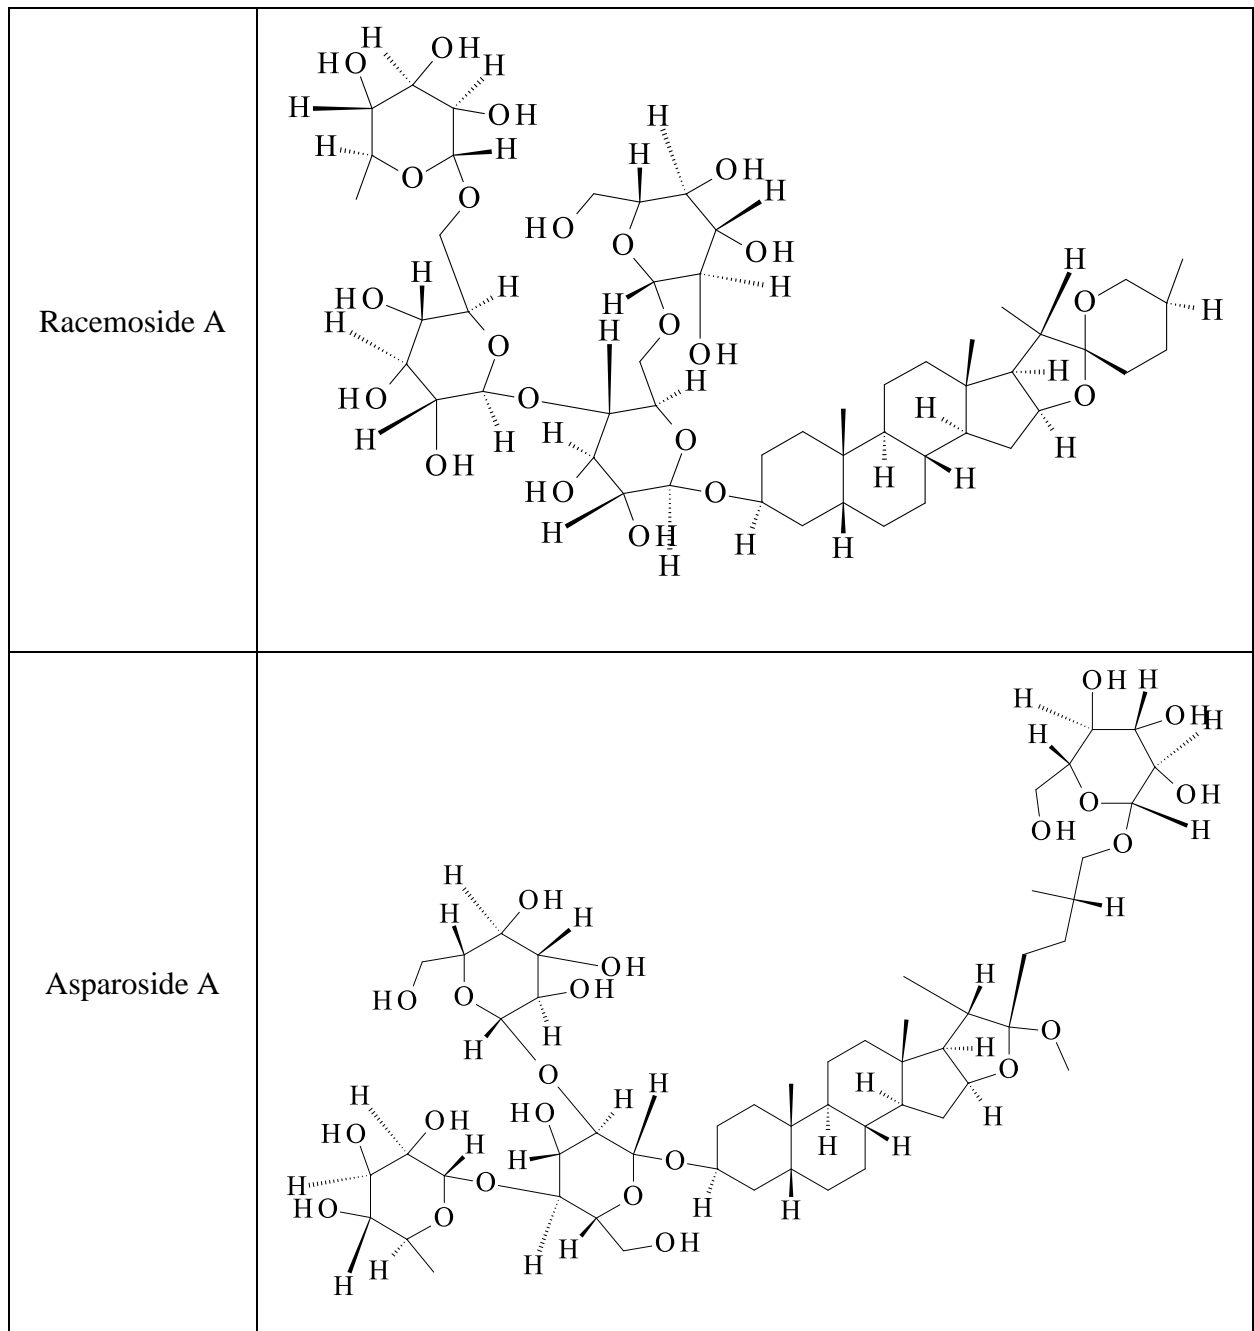

|                       |                                                                                                                                                                                                                                                                                                                                                                                                                                                                                                                                                                                                                                                                                                                                                                            |
|-----------------------|----------------------------------------------------------------------------------------------------------------------------------------------------------------------------------------------------------------------------------------------------------------------------------------------------------------------------------------------------------------------------------------------------------------------------------------------------------------------------------------------------------------------------------------------------------------------------------------------------------------------------------------------------------------------------------------------------------------------------------------------------------------------------|
| <p>Shatavarin VI</p>  | 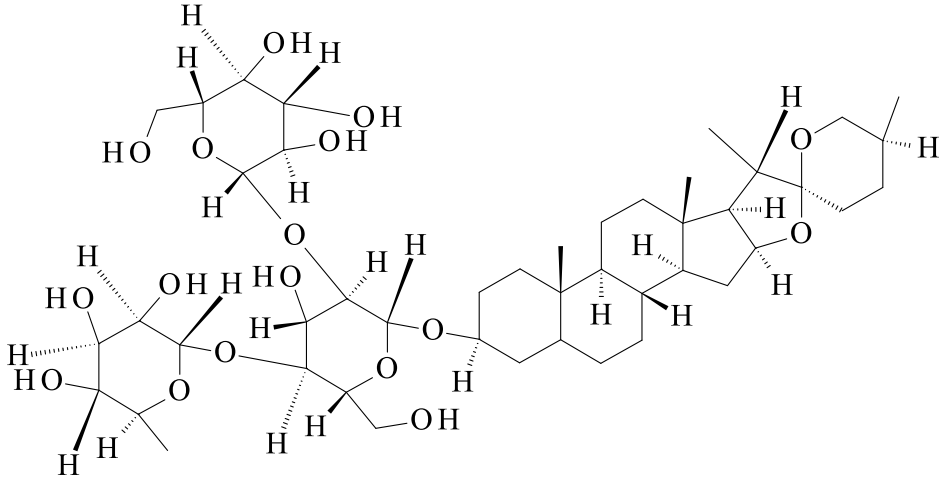 <p>The structure of Shatavarin VI consists of a pentacyclic steroid nucleus (estrane type) with a side chain at C-13. This side chain is a branched chain of five pyranose rings. The rings are linked as follows: a pyranose ring at C-13 is linked to a second pyranose ring at its C-2 position, which is in turn linked to a third pyranose ring at its C-2 position. This third ring is linked to a fourth pyranose ring at its C-2 position, which is finally linked to the steroid nucleus at its C-2 position. The stereochemistry of the hydroxyl groups and the glycosidic linkages is explicitly shown with wedges and dashes.</p>                                           |
| <p>Racemoside B</p>   |  <p>The structure of Racemoside B features a pentacyclic steroid nucleus with a side chain at C-13. The side chain is a branched chain of four pyranose rings. It starts with a pyranose ring at C-13, which is linked to a second pyranose ring at its C-2 position. This second ring is linked to a third pyranose ring at its C-2 position, which is then linked to the steroid nucleus at its C-2 position. The stereochemistry is clearly indicated with wedges and dashes.</p>                                                                                                                                                                                                    |
| <p>Asparagoside F</p> |  <p>The structure of Asparagoside F is a complex molecule consisting of a pentacyclic steroid nucleus with a side chain at C-13. The side chain is a branched chain of six pyranose rings. It begins with a pyranose ring at C-13, which is linked to a second pyranose ring at its C-2 position. This second ring is linked to a third pyranose ring at its C-2 position, which is then linked to a fourth pyranose ring at its C-2 position. The fourth ring is linked to a fifth pyranose ring at its C-2 position, which is finally linked to the steroid nucleus at its C-2 position. The stereochemistry of all hydroxyl groups and glycosidic linkages is explicitly shown.</p> |

|                    |                                                                                                                                                                                                                                                                                                                                                                                                                                                                                                                        |
|--------------------|------------------------------------------------------------------------------------------------------------------------------------------------------------------------------------------------------------------------------------------------------------------------------------------------------------------------------------------------------------------------------------------------------------------------------------------------------------------------------------------------------------------------|
| <p>Quercetin</p>   | 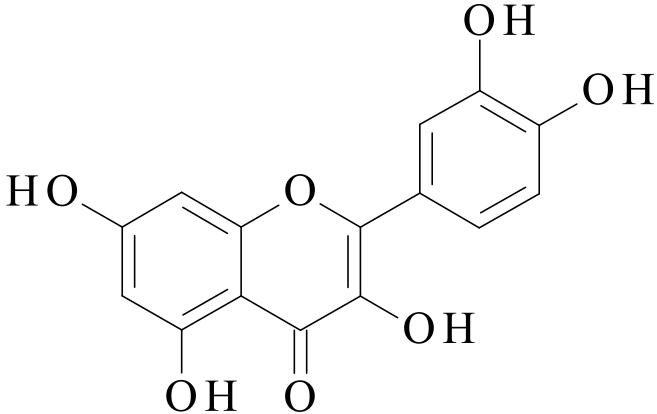 <p>The chemical structure of Quercetin is a flavonoid. It consists of a central chromone ring system (a benzopyrone core). The A-ring (the benzene ring fused to the pyrone ring) has hydroxyl groups at positions 5 and 7. The C-ring (the pyrone ring) has a carbonyl group at position 4 and a hydroxyl group at position 3. The B-ring (the phenyl ring attached to the C-ring) has hydroxyl groups at positions 3' and 4'.</p> |
| <p>Asparanin D</p> |  <p>The chemical structure of Asparanin D is a complex polyether. It features a central chain of four six-membered rings connected by ether linkages. This chain is substituted with several hydroxyl groups and a complex side chain. The side chain includes a five-membered ring and a six-membered ring, both containing ether linkages, and is further substituted with methyl groups.</p>                                     |



Shatavaroside B

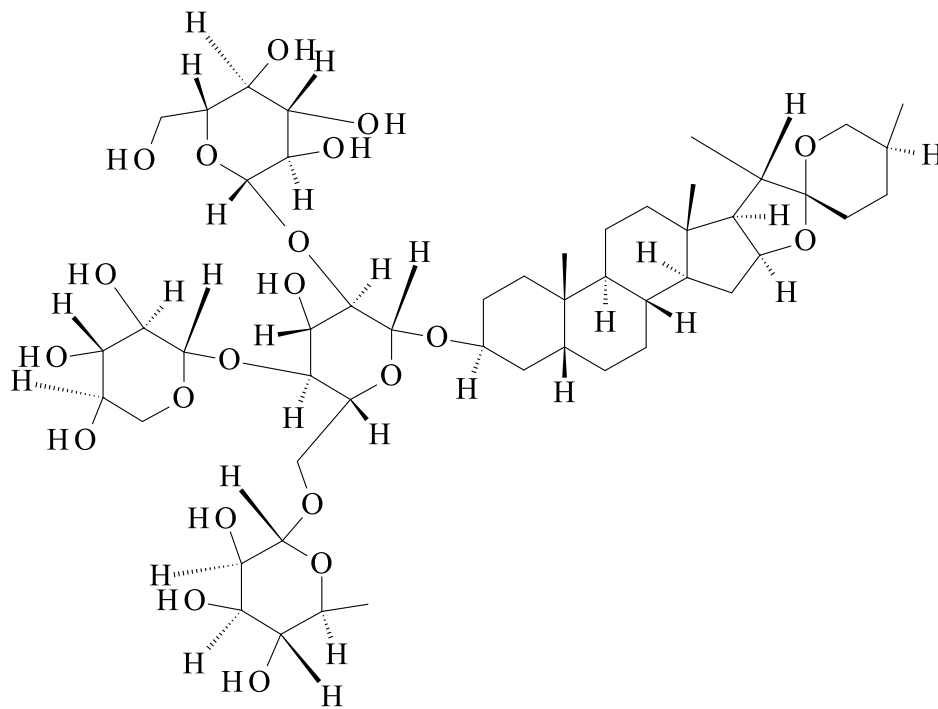

Kaempferol

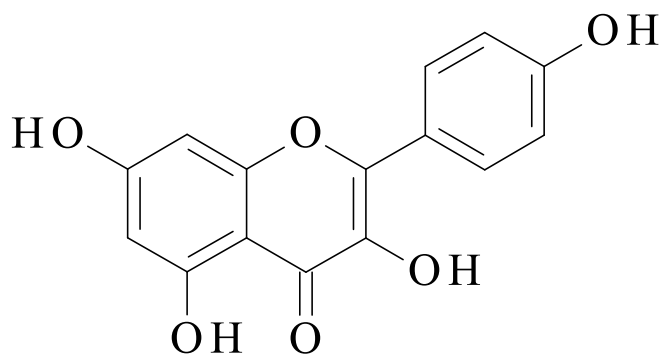

Curillin H

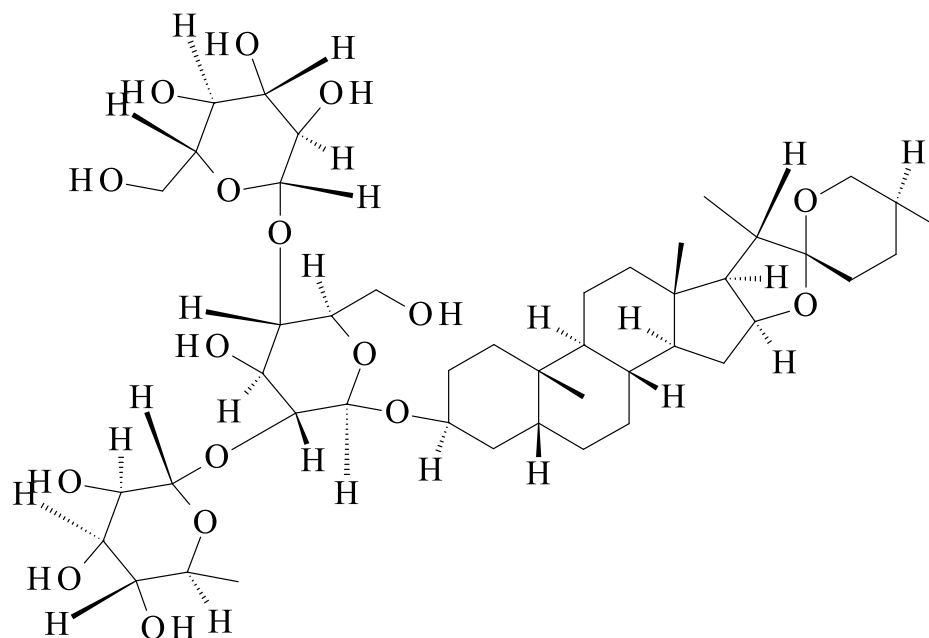

Remdesivir

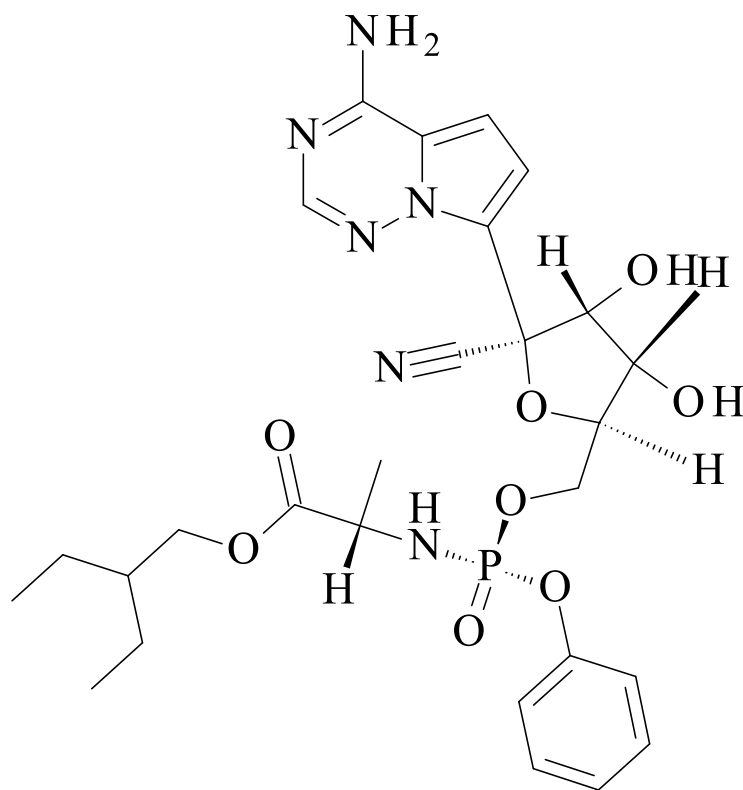

Shatavarin IX

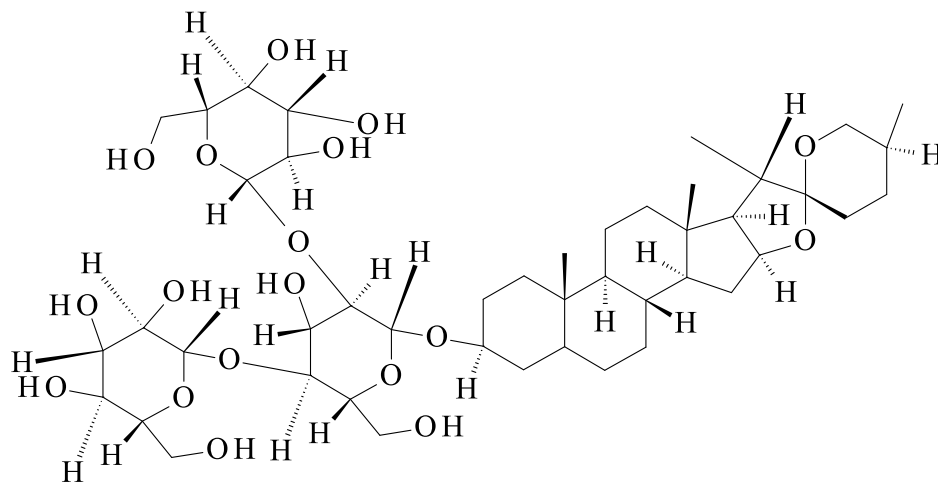

Shatavarin VIII

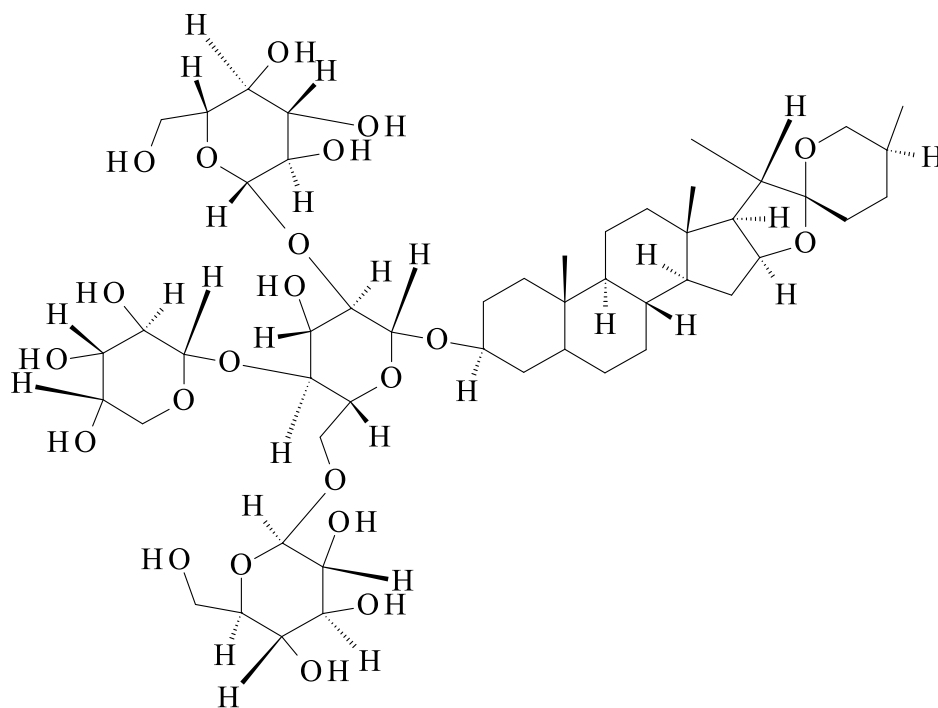

|                                 |                                                                                     |
|---------------------------------|-------------------------------------------------------------------------------------|
| <p>Sarsasapogenin<br/>N</p>     | 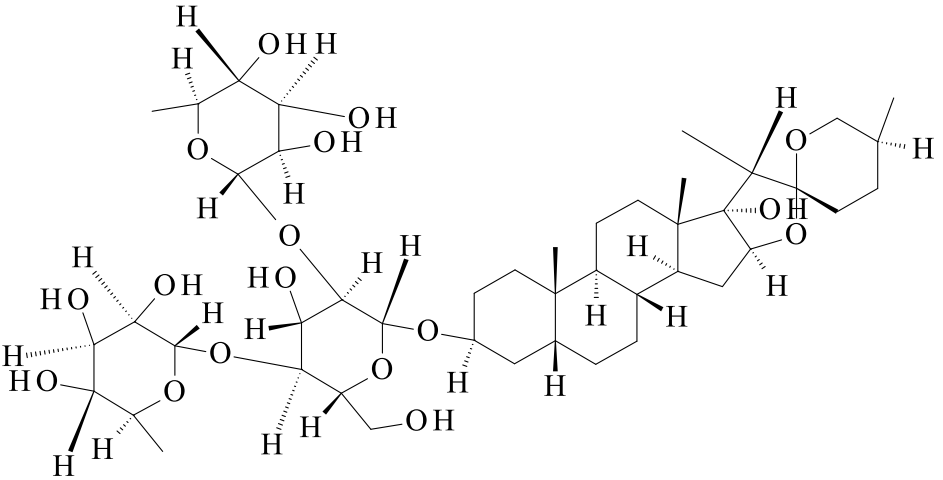  |
| <p>Hyperoside<br/>(Hyperin)</p> |  |

|                       |                                                                                                                                                                                                                                                                                                                                                                                                                                                                                                                                                                               |
|-----------------------|-------------------------------------------------------------------------------------------------------------------------------------------------------------------------------------------------------------------------------------------------------------------------------------------------------------------------------------------------------------------------------------------------------------------------------------------------------------------------------------------------------------------------------------------------------------------------------|
| <p>Shatavarin VII</p> | 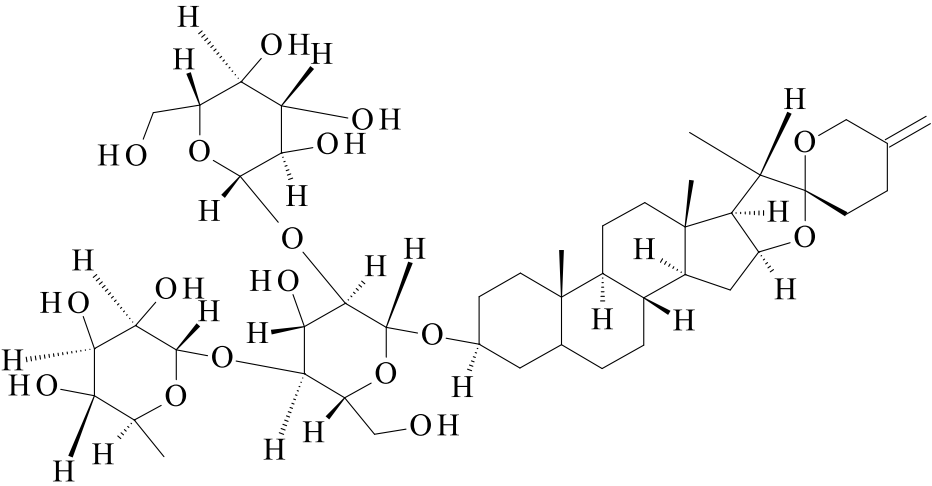 <p>The chemical structure of Shatavarin VII is a complex molecule consisting of a central steroid nucleus (estrane skeleton) with a methyl group at C-13 and a propyl group at C-14. It is substituted with a 2,6-dideoxy-β-D-glucopyranosyl group at C-3 and a 2,6-dideoxy-β-D-glucopyranosyl group at C-28. The glucose units are linked via their C-1 positions to the steroid oxygen atoms at C-3 and C-28, respectively. The stereochemistry is indicated with wedges and dashes.</p> |
| <p>Asparanin A</p>    |  <p>The chemical structure of Asparanin A is a complex molecule consisting of a central steroid nucleus (estrane skeleton) with a methyl group at C-13 and a propyl group at C-14. It is substituted with a 2,6-dideoxy-β-D-glucopyranosyl group at C-3 and a 2,6-dideoxy-β-D-glucopyranosyl group at C-28. The glucose units are linked via their C-1 positions to the steroid oxygen atoms at C-3 and C-28, respectively. The stereochemistry is indicated with wedges and dashes.</p>   |
| <p>Racemoside C</p>   |  <p>The chemical structure of Racemoside C is a complex molecule consisting of a central steroid nucleus (estrane skeleton) with a methyl group at C-13 and a propyl group at C-14. It is substituted with a 2,6-dideoxy-β-D-glucopyranosyl group at C-3 and a 2,6-dideoxy-β-D-glucopyranosyl group at C-28. The glucose units are linked via their C-1 positions to the steroid oxygen atoms at C-3 and C-28, respectively. The stereochemistry is indicated with wedges and dashes.</p> |

Racemosol

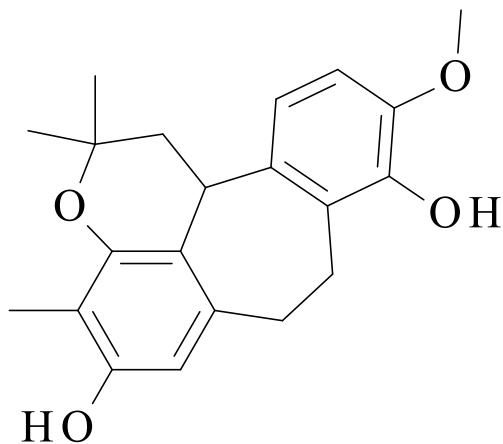

Shatavaroside A

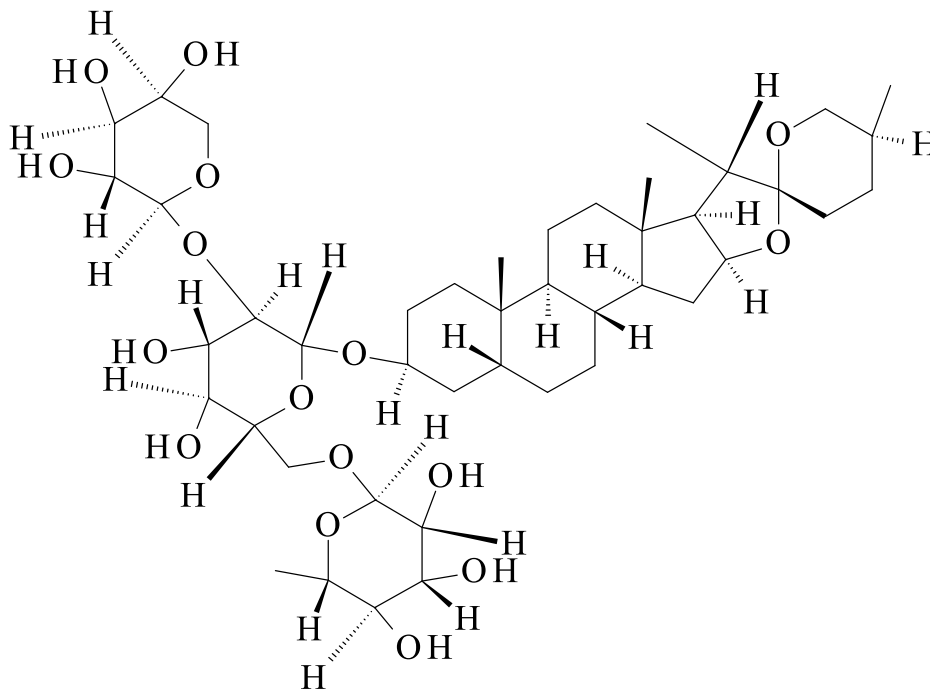

Curillin G

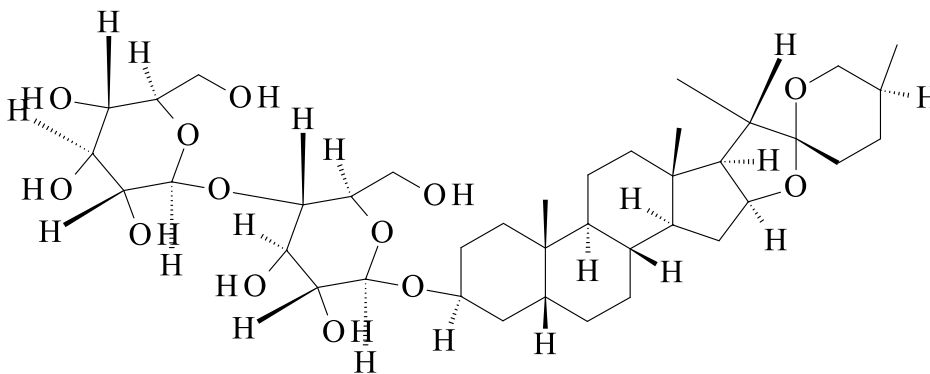

Sarsasapogenin

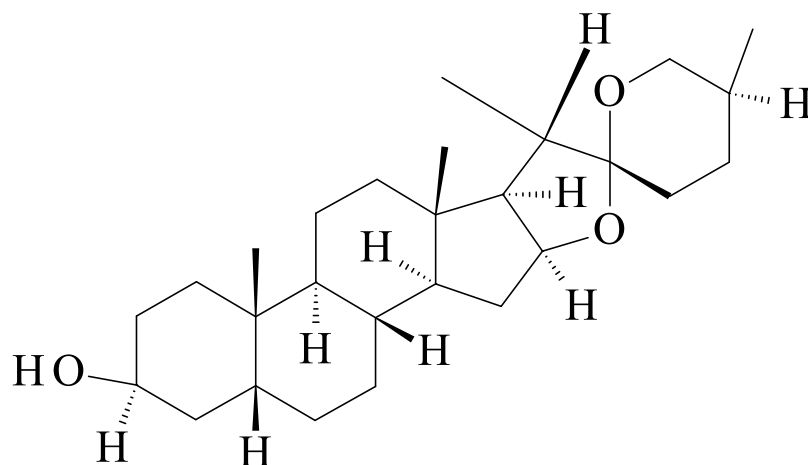

Asparanin C

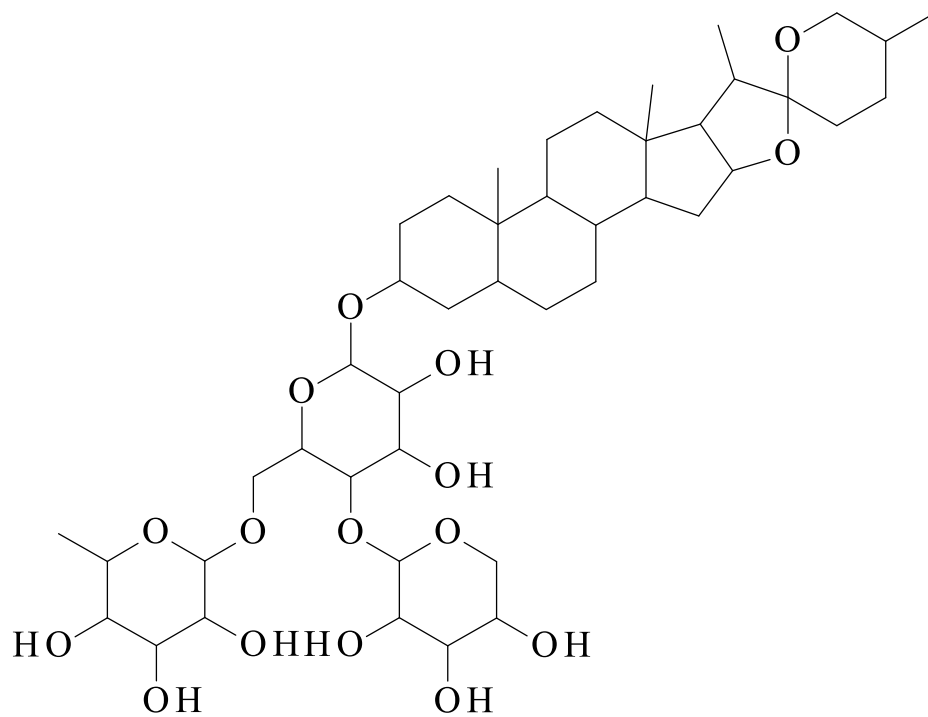

Racemosol C

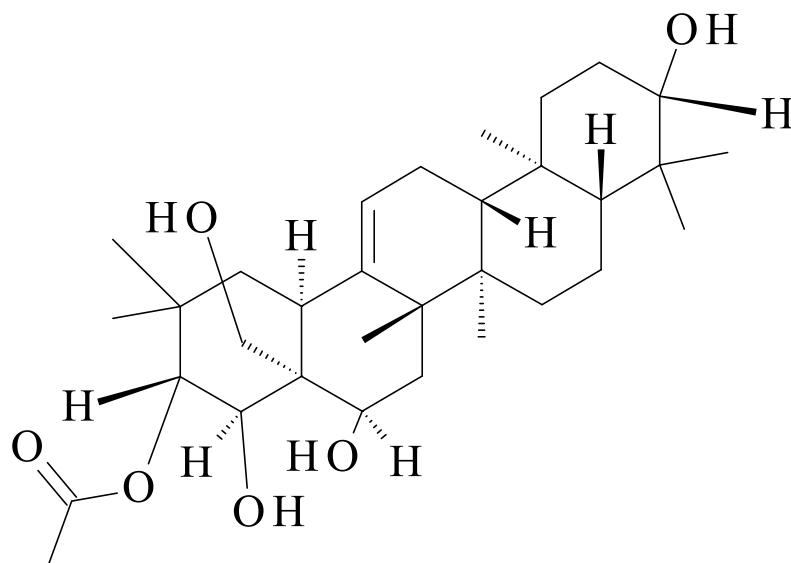

Racemosol D

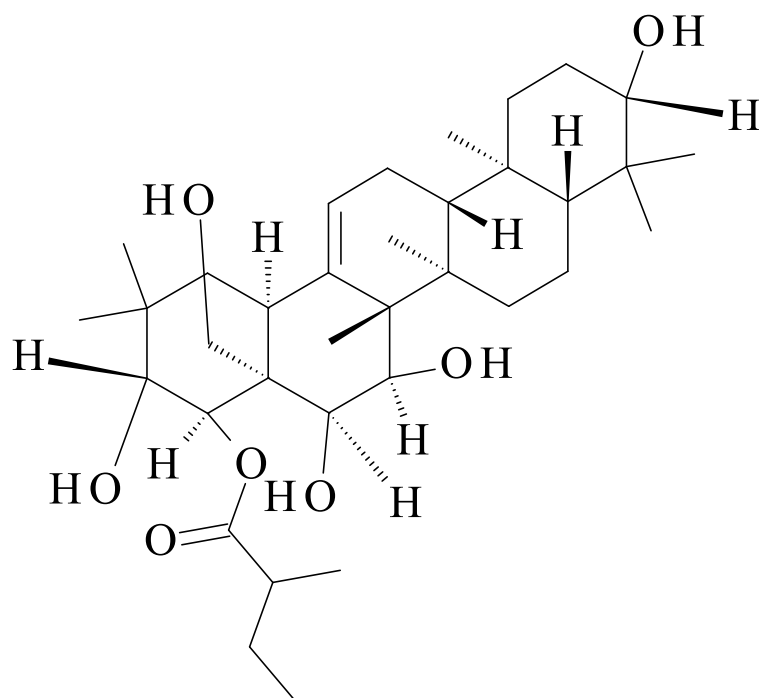



Racemosol B

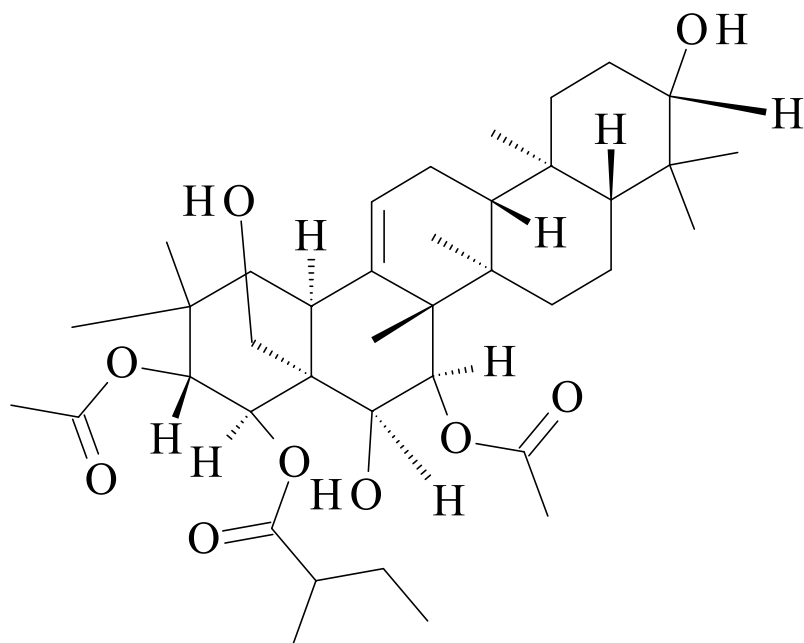

Racemosol A

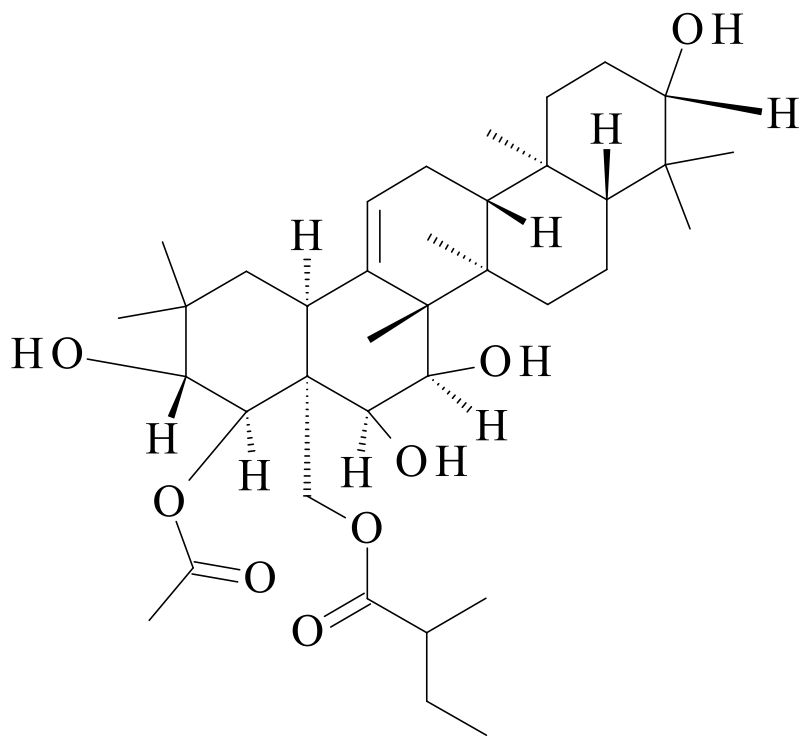

Supplement: TBSD_A_1784289_SM3629.pdf [file TBSD_A_1784289_SM3629.pdf]
